# Supplementary material
Source: Research Square preprint supplement (doi:10.21203/rs.3.rs-9965150/v1)
Supplement: Supplementary file 1 [file 9fe8a8378554e427f4b0d887.docx]

**Table S1**: Baseline characteristics

| Variable | level | Neither | RKFD only | IDS only | Both | p | test |
| --- | --- | --- | --- | --- | --- | --- | --- |
| n |  | 2124 | 656 | 939 | 298 |  |  |
| age..mean..SD.. |  | 58.38 (8.65) | 59.79 (8.81) | 57.94 (8.35) | 59.18 (9.01) | <0.001 |  |
| Sex.... | Male | 1000 (47.1) | 333 (50.8) | 369 (39.3) | 137 (46.0) | <0.001 |  |
| X | Female | 1124 (52.9) | 323 (49.2) | 570 (60.7) | 161 (54.0) |  |  |
| Residence.... | Rural | 1053 (49.6) | 322 (49.1) | 486 (51.8) | 161 (54.0) | 0.232 |  |
| X.1 | Urban | 233 (11.0) | 78 (11.9) | 80 (8.5) | 26 (8.7) |  |  |
| X.2 | Unknown | 838 (39.5) | 256 (39.0) | 373 (39.7) | 111 (37.2) |  |  |
| Smoking.... | No | 1317 (62.0) | 390 (59.5) | 604 (64.3) | 183 (61.4) | 0.262 |  |
| X.3 | Yes | 807 (38.0) | 266 (40.5) | 335 (35.7) | 115 (38.6) |  |  |
| Drinking.... | No | 1701 (80.1) | 539 (82.2) | 768 (81.8) | 238 (79.9) | 0.523 |  |
| X.4 | Yes | 423 (19.9) | 117 (17.8) | 171 (18.2) | 60 (20.1) |  |  |
| Physical_Act.... | <600 METs | 151 (7.1) | 43 (6.6) | 54 (5.8) | 18 (6.0) | 0.408 |  |
| X.5 | >=600 METs | 743 (35.0) | 253 (38.6) | 361 (38.4) | 110 (36.9) |  |  |
| X.6 | Other | 1230 (57.9) | 360 (54.9) | 524 (55.8) | 170 (57.0) |  |  |
| WHtR_High.... | Normal (<0.5) | 611 (28.8) | 209 (31.9) | 273 (29.1) | 93 (31.2) | 0.423 |  |
| X.7 | High (>=0.5) | 1513 (71.2) | 447 (68.1) | 666 (70.9) | 205 (68.8) |  |  |
| Comorbidity.... | 0 | 397 (18.7) | 119 (18.1) | 208 (22.2) | 62 (20.8) | 0.211 |  |
| X.8 | 1 | 822 (38.7) | 267 (40.7) | 333 (35.5) | 110 (36.9) |  |  |
| X.9 | >=2 | 905 (42.6) | 270 (41.2) | 398 (42.4) | 126 (42.3) |  |  |
| Pain.... | No | 1398 (65.8) | 410 (62.5) | 628 (66.9) | 202 (67.8) | 0.246 |  |
| X.10 | Yes | 726 (34.2) | 246 (37.5) | 311 (33.1) | 96 (32.2) |  |  |
| Sleep.... | <6h | 657 (30.9) | 195 (29.7) | 231 (24.6) | 74 (24.8) | 0.001 |  |
| X.11 | 6-9h | 1323 (62.3) | 409 (62.3) | 629 (67.0) | 189 (63.4) |  |  |
| X.12 | >=9h | 144 (6.8) | 52 (7.9) | 79 (8.4) | 35 (11.7) |  |  |
| CRP..mean..SD.. |  | 2.39 (5.55) | 2.40 (4.88) | 2.35 (6.39) | 2.55 (5.78) | 0.966 |  |
| uric_acid..mean..SD.. |  | 4.36 (1.17) | 4.40 (1.30) | 4.29 (1.17) | 4.46 (1.27) | 0.117 |  |
| Depression_Base.... | No | 1199 (56.5) | 366 (55.8) | 720 (76.7) | 232 (77.9) | <0.001 |  |
| X.13 | Yes | 925 (43.5) | 290 (44.2) | 219 (23.3) | 66 (22.1) |  |  |

**Note:** Data are presented as mean ± standard deviation (SD) for continuous variables and as number (percentage) for categorical variables. P values were calculated using one-way analysis of variance (ANOVA) for continuous variables or Chi-square tests for categorical variables, as appropriate for between-group comparisons across the four exposure groups.

**Abbreviations:** RKFD, Rapid Kidney Function Decline; IDS, Increase in Depression Symptoms; WHtR, Waist-to-Height Ratio; CRP, C-Reactive Protein.

**Table S2**: Multivariable logistic regression

| Variable | OR (95% CI) | P Value |
| --- | --- | --- |
| (Intercept) | 0.01 (0.00-0.02) | <0.001 |
| Joint_GroupRKFD only | 1.02 (0.73-1.42) | 0.884 |
| Joint_GroupIDS only | 1.42 (1.07-1.88) | 0.015 |
| Joint_GroupBoth | 2.24 (1.52-3.23) | <0.001 |
| age | 1.02 (1.01-1.03) | 0.002 |
| SexFemale | 0.88 (0.63-1.24) | 0.475 |
| SmokingYes | 1.16 (0.85-1.59) | 0.352 |
| DrinkingYes | 0.80 (0.57-1.11) | 0.184 |
| WHtR_HighHigh (>=0.5) | 1.82 (1.35-2.48) | <0.001 |
| Comorbidity1 | 1.30 (0.87-1.96) | 0.209 |
| Comorbidity>=2 | 2.40 (1.66-3.57) | <0.001 |
| CRP | 1.02 (1.00-1.03) | 0.006 |
| uric_acid | 1.04 (0.94-1.15) | 0.438 |
| Depression_BaseYes | 1.53 (1.20-1.93) | <0.001 |

**Table S3**: Model performance comparison

| Model | AUC | AIC | P. for. Comparison |
| --- | --- | --- | --- |
| Baseline | 0.666 | 2262.2 | Ref |
| Full Model | 0.678 | 2249.2 | 0.0357 |
